# Supplementary material
Source: HighWire-hosted journal article supplement (http://ajnr-stage2.highwire.org/highwire/filestream/89796/field_highwire_adjunct_files/0/1101.pdf)

## SUPPLEMENTAL MATERIAL

**Supplementary Table 1.** MR imaging parameters

| Parameters                              | 3D-T2-FLAIR <sup>a</sup> | 3D-T1-FSPGR | 3D-T1-TSE   |
|-----------------------------------------|--------------------------|-------------|-------------|
| Repetition time (msec)                  | 4800                     | 9.7–9.9     | 500         |
| Echo time (msec)                        | 267.4–269.2              | 4.6–4.7     | 34.8        |
| Echo train length                       | 120                      | 1           | 20          |
| Flip angle (degree)                     | 120                      | 20          | 90          |
| Section thickness (mm)                  | 1.2                      | 0.6         | 1.2         |
| Field of view (mm)                      | 150 × 150                | 150 × 150   | 150 × 150   |
| Matrix                                  | 216 × 215                | 252 × 250   | 252 × 250   |
| No. of signals acquired                 | 1                        | 1           | 1           |
| Parallel imaging factor <sup>b</sup>    | 1.5 [2.0]                | x           | 1.5 [2.0]   |
| Acquisition time <sup>c</sup> (min:sec) | 5:07 [5:43]              | 3:44 [3:50] | 3:43 [3:55] |
| No. of sections                         | 90                       | 180         | 90          |

All patients were scanned at a 3.0T scanner; either Signa Architect (GE Healthcare, Milwaukee, Wisconsin) or Achieva (Philips, Amsterdam, Netherlands). <sup>a</sup>Only 3D-T2-FLAIR sequence, which was acquired on the Architect utilized compressed sensing factor of 1.3.

<sup>b,c</sup>Parameters for the Architect scanner are in square brackets.

**Supplementary Table 2.** Comparison of diagnostic accuracy of 3D-T2-FLAIR, 3D-T1-FSPGR, and 3D-T1-TSE

|                         |              | Sensitivity (%) | Specificity (%) | Accuracy (%) |
|-------------------------|--------------|-----------------|-----------------|--------------|
| Inexperienced<br>reader | 3D-T2-FLAIR  | 55              | 60              | 57           |
|                         | 3D-T1-FSPGR  | 50              | 65              | 57           |
|                         | 3D-T1-TSE    | 80              | 100             | 90           |
| Experienced<br>reader   | 3D-T2-FLAIR  | 30              | 90              | 60           |
|                         | 3D-T1- FSPGR | 85              | 80              | 82           |
|                         | 3D-T1-TSE    | 85              | 90              | 87           |

**Supplementary Table 3.** AUC for the detection of neuritis

|                      | 3D-T2-FLAIR | 3D-T1-FSPGR | 3D-T1-TSE | <i>p</i> -value |               |               |
|----------------------|-------------|-------------|-----------|-----------------|---------------|---------------|
|                      |             |             |           | 3D-T1-FSPGR vs. | 3D-T1-TSE vs. | 3D-T1-TSE vs. |
|                      |             |             |           | 3D-T2-FLAIR     | 3D-T2-FLAIR   | 3D-T1- FSPGR  |
| Inexperienced reader | 0.56        | 0.75        | 0.91      | 0.083           | 0.001         | 0.053         |
| Experienced reader   | 0.71        | 0.86        | 0.87      | 0.044           | 0.049         | 0.891         |

**Supplementary Figure 1.** A clinical head band phantom (a) containing gadobutrol solutions (Gadovist; Bayer Schering Pharma, Berlin, Germany) of varying concentrations (range, 0.0125 to 3 mmol/L), (b) a representative scan of the head band set to the volunteer's head.

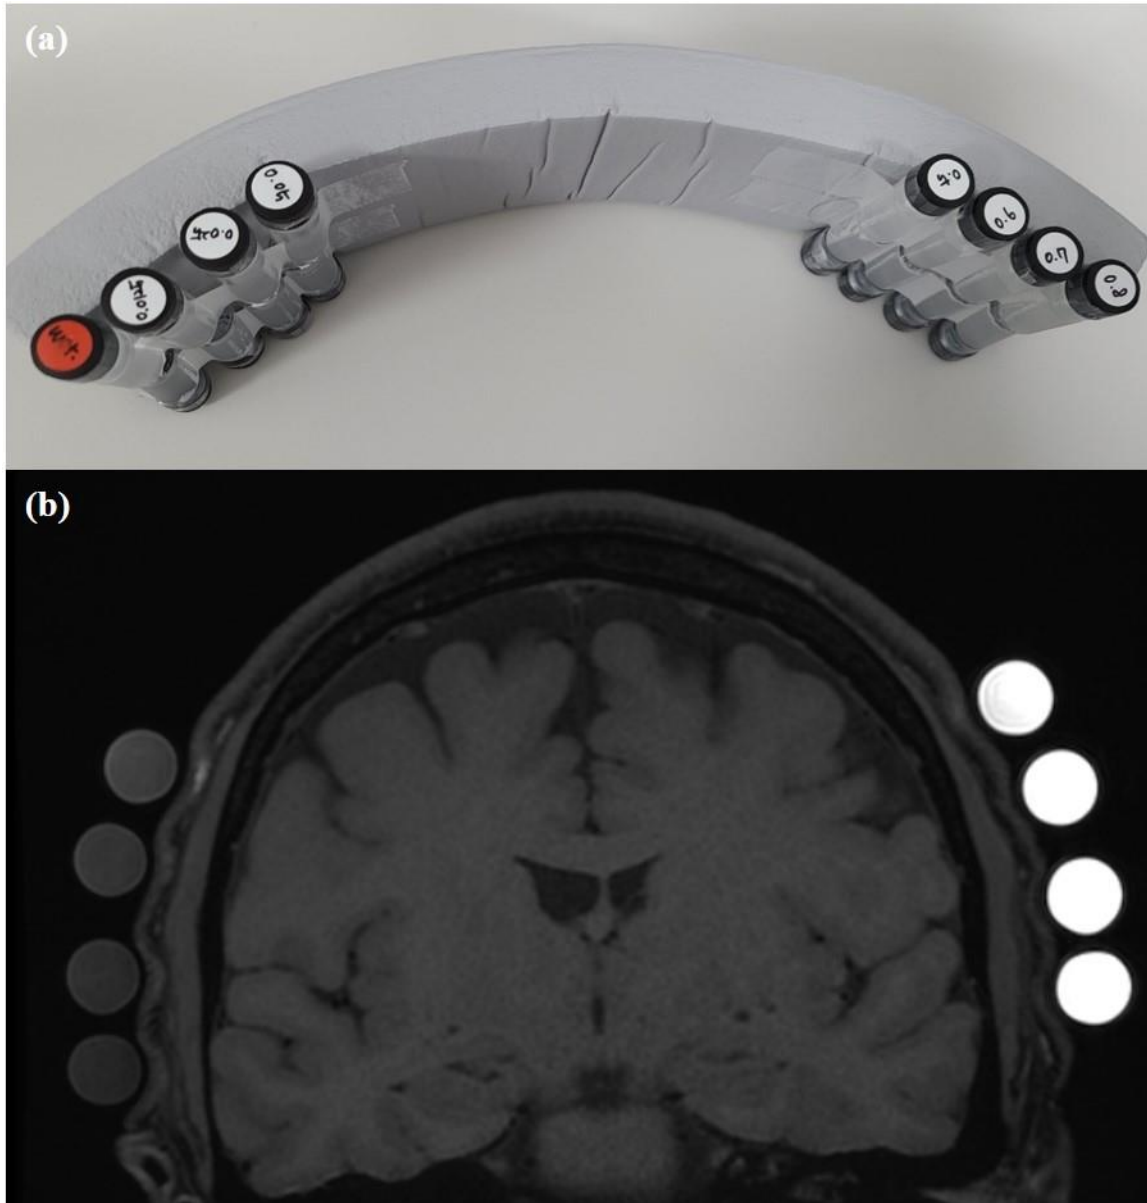

**Supplementary Figure 2.** The signal intensity ratios of various concentrations of gadobutrol solution to normal white matter on 3D T1-TSE, 3D-T1-FSPGR and 3D-T2-FLAIR images.

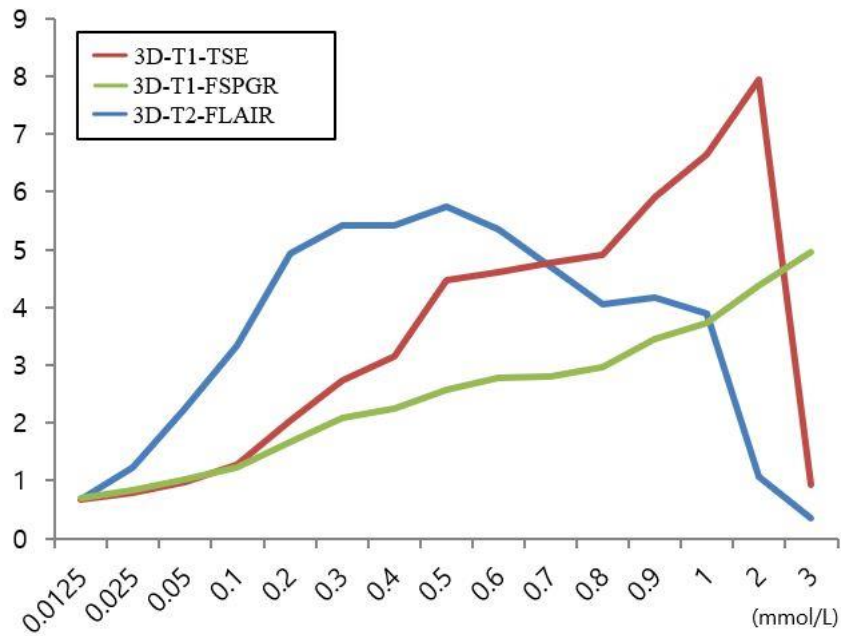

Supplement: 1101.pdf [file 1101.pdf]
